# Supplementary material for: Gemini Alkyldeoxy-D-Glucitolammonium Salts as Modern Surfactants and Microbiocides: Synthesis, Antimicrobial and Surface Activity, Biodegradation
Source: PLoS One. 2014 Jan 8;9(1):e84936. doi: 10.1371/journal.pone.0084936 (PMC3885657; doi:10.1371/journal.pone.0084936)
Supplement: Materials and Methods S1 — (DOC) [file pone.0084936.s010.doc]

**Supplementary Materials and Methods**

**Tetramethylene-1,4-bis(*N*–D-glucopyranosylamine) (I-1)** (Figure S1) (IUPAC name: (2S,3R,4R,5S,6S)-2-(hydroxymethyl)-6-((4-(((2R,3R,4S,5S,6R)-3,4,5-trihydroxy-6-(hydroxymethyl)tetrahydro-2*H*-pyran-2-yl)amino)butyl)amino)tetrahydro-2*H*-pyran-3,4,5-triol) was obtained by reaction of D-glucose (36 g, 0.2 mol) with tetramethylenediamine (8.8 g, 0.1 mol) in methanol (200 mL). Reagents were stirred at room temperature for 8 h. The precipitate was filtered off under reduced pressure and dried over P4O10. Yield 95%, 78.3 g. **Mp** 108-110oC. **1H NMR** (D2O) δ (ppm) 1.53 (m, 4H); 2.69, 2.87 (m, m, 4H); 3.22 (m, 2H); 3.38 (m, 4H); 3.50 (m, 2H); 3.73 (m, 2H); 3.89 (m, 2H); 4.00 (d, *J* = 8,8 Hz, 2H); **13C NMR** (D2O) δ (ppm) 29.5; 47.6; 63.7; 72.7; 75.8; 79.6; 79.7; 92.4. **FTIR** νmax/cm-1 3390 (OH, NH), 2912 and 2862 (CH), 1083 (CO).

**Hexamethylene-1,6-bis(*N*–D-glucopyranosylamine) (I-2)** (Figure S1) (IUPAC name: (2S,3R,4R,5S,6S)-2-(hydroxymethyl)-6-((6-(((2R,3R,4S,5S,6R)-3,4,5-trihydroxy-6-(hydroxymethyl)tetrahydro-2*H*-pyran-2-yl)amino)hexyl)amino)tetrahydro-2*H*-pyran-3,4,5-triol) was obtained by condensation of D-glucose (36 g, 0.2 mol) with hexamethylenediamine (11.6 g, 0.1 mol) in methanol (200 mL). Reaction mixture was stirred at room temperature for 10 h. The precipitate was filtered off under a reduced pressure and dried over P4O10. Yield 95%, 83.6 g. **Mp** 114-115oC. **1H NMR** (D2O) δ (ppm) 1.35 (m, 4H); 1.50 (m, 4H); 2.67, 2.87 (m, m, 4H); 3.21 (m, 2H); 3.37 (m, 4H); 3.49 (m, 2H); 3.71 (m, 2H); 3.89 (m, 2H); 3.99 (d, *J* = 8,8 Hz, 2H); **13C NMR** (D2O) δ (ppm) 28.1; 31.6; 47.8; 63.7; 72.7; 75.8; 79.5; 79.6; 92.4. **FTIR** νmax/cm-1 3394 (OH, NH), 2930 and 2859 (CH), 1096 (CO).

**Tetramethylene-1,4-bis(*N*-deoxy-D-glucitolammonium chloride) (I-3)** (Figure S2) (IUPAC name: (2S,3R,4R,5R)-(2,3,4,5,6-pentahydroxyhexyl)({4-[(2S,3R,4R,5R)-(2,3,4,5,6-pentahydroxyhexyl)-azaniumyl]butyl}azanium dichloride) was obtained by the reaction of tetramethylene-1,4-bis(*N*–D-glucopyranosylamine) **(I-1)** (8.2 g, 0.02 mol) with sodium borohydride (1.9 g, 0.05 mol) in methanol (150 mL) at 0oC. The mixture was stirred at room temperature until hydrogen evolution ceased and then concentrated hydrochloric acid was added to pH of 2-3. After 24 h the crude product was filtered off under reduced pressure, dried over P4O10 and purified by crystallization from methanol:water 2:1. Yield 90%, 8.7 g. **Mp** 198-201oC. **1H NMR** (D2O) δ (ppm) 1.83 (m, 4H); 3.18 (m, 4H); 3.19, 3.27 (m, m, 4H); 3.66 (m, 2H); 3.68, 3.82 (m, m, 4H); 3.77 (m, 2H); 3.84 (m, 2H); 4.13 (m, 2H); **13C NMR** (D2O) δ (ppm) 25.4; 49.8; 52.3; 65.5; 71.0; 73.3; 73.4; 73.7, **FTIR** νmax/cm-1 3410 (OH, NH), 2992 and 2885 (CH), 1093 (CO). **Elemental analysis** calculated for C16H38N2O10Cl2, C 39.26, H 7.77, N 5.73 % (found: C 39.19, H 7.89, N 5.69%).

**Hexamethylene-1,6-bis(*N*-deoxy-D-glucitolammonium chloride) (I-4)** (Figure S2) (IUPAC name: (2S,3R,4R,5R)-(2,3,4,5,6-pentahydroxyhexyl)({6-[(2S,3R,4R,5R)-2,3,4,5,6-pentahydroxyhexyl)-azaniumyl]hexyl}azanium dichloride) was obtained by the reaction of hexamethylene-1,6-bis(*N*–D-glucopyranosylamine) **(I-2**) (8.8 g, 0.02 mol) with sodium borohydride (1.9 g, 0.05 mol) in methanol (150 mL) at 0oC. The mixture was stirred at room temperature until hydrogen evolution ceased and then concentrated hydrochloric acid was added to pH of 2-3. After 24 h the crude product was filtered off under reduced pressure, dried over P4O10, and purified by crystallization from methanol:water 2:1. Yield 87%, 9.0 g. **Mp** 196-199oC. **1H NMR** (D2O) δ (ppm) 1.44 (m, 4H); 1.76 (m, 4H); 3.12 (m, 4H); 3.18, 3.27 (m, m, 4H); 3.65 (m, 2H); 3.67, 3.82 (m, m 4H); 3.76 (m, 2H); 3.84 (m, 2H); 4.11 (m, 2H); **13C NMR** (D2O) δ (ppm) 27.8; 28.0; 50.3; 52.1; 65.4; 70.9; 73.2; 73.3; 73.6, **FTIR** νmax/cm-1 3417 (OH, NH), 2993 and 2880 (CH), 1095 (CO). **Elemental analysis** calculated for C18H42N2O10Cl2, C 41.78, H 8.12, N 5.42% (found: C 41.35, H 7.98, N 5.38%).

**Tetramethylene-1,4-bis(*N*-alkyl-*N*-deoxy-D-glucitolammonium acetates)** **(I-5 ÷ I-8)** (Figure S3) (IUPAC name: alkyl({4-[alkyl-(2S,3R,4R,5R)-(2,3,4,5,6-pentahydroxyhexyl)azaniumyl]butyl})(2S,3R,4R,5R)-(2,3,4,5,6-pentahydroxyhexyl)azane bis(acetates)): To the solution oftetramethylene-1,4-bis(*N*-deoxy-D-glucitolammonium chloride) **(I-3)** (4.89 g, 0.01 mol) in methanol (100 mL), sodium hydroxide (0.8 g, 0.02 mol) was added. The reaction mixtures were stirred, and respectively aldehyde (hexanal (2.44 mL, 0.02 mol), oktanal (3.16 mL, 0.02 mol), decanal (3.83 mL, 0.02 mol), or dodecanal (4.49 mL, 0.02 mol)) and sodium cyanoborohydride (1.65 g, 0.02 mol) were added. After 15 minutes the pH was adjusted with acetic acid (to between 6 and 8). The reaction mixtures were stirred for 18 hours at room temperature. After that time undissolved precipitates were filtered off, the solvent was evaporated and the high viscosity residues were heated in 2-propanol for 30 minutes. Undissolved precipitates were filtered off, the solvent was evaporated and the residues were washed with diethyl ether. The white products were dried over P4O10.

**Tetramethylene-1,4-bis(*N*-hexyl-*N*-deoxy-D-glucitolammonium acetate) (I-5)** (Figure S3) Yield 30 %, 2.1 g. **Mp** 110-115oC. **1H NMR** (TFA-d) δ (ppm) 0.96 (t, *J* = 6.3 Hz, 6H); 1.40 (m, 12H); 1.86 (m, 4H); 2.06 (m, 4H); 2.28 (s, 6H); 3.41 (m, 4H); 3.60 (m, 4H); 3.72 (m, 4H); 4.24 (m, 2H); 4.28, 4.41 (m, m, 4H); 4,49 (m, 2H); 4.65 (m, 2H); 4.83 (m, 2H); 7.35 (s, 2H). **13C NMR** (TFA-d) δ (ppm) 12.6; 19.2; 22.3; 23.9; 26.0; 31.2; 53.1; 54.6; 56.7; 62.9; 68.2; 69.7; 72.0; 74.1; 181.6. **FTIR** νmax/cm-1 3383 (OH, NH), 2933 and 2860 (CH), 1578 (C=O), 1085 (CO). **ESIMS** m/z 293 ([M/2]+, 100%). **Elemental analysis** calculated for C32H68N2O14, C 54.53, H 9.72, N 3.97% (found: C 54.14, H 9.45, N 4.09%).

**Tetramethylene-1,4-bis(*N*-octyl-*N*-deoxy-D-glucitolammonium acetate) (I-6)** (Figure S3) Yield 60 %, 4.7 g. **Mp** 120-124oC. **1H NMR** (TFA-d) δ (ppm) 0.93 (t, *J* = 6.6 Hz, 6H); 1.40 (m, 20H); 1.86 (m, 4H); 2.06 (m, 4H); 2.28 (s, 6H); 3.44 (m, 4H); 3.60 (m, 4H); 3.71 (m, 4H); 4.23 (m, 2H); 4.28, 4.46(m, m, 4H); 4,50 (m, 2H); 4.67 (m, 2H); 4.82 (m, 2H); 7.35 (s, 2H). **13C NMR** (TFA-d) δ (ppm) 12.6; 19.0; 22.3; 23.9; 26.3; 28.9; 31.6; 53.0; 54.9; 56.6; 64.7; 68.0; 69.6; 70.3; 73.9; 181.5. **FTIR** νmax/cm-1 3428(OH, NH), 2928 and 2857 (CH), 1571 (C=O), 1087 (CO). **ESIMS** m/z 321 ([M/2]+, 100%). **Elemental analysis** calculated for C36H76N2O14xH2O, C 55.50, H 10.09, N 3.60% (found: C 55.37, H 9.69, N 3.82%).

**Tetramethylene-1,4-bis(*N*-decyl-*N*-deoxy-D-glucitolammonium acetate) (I-7)** (Figure S3) Yield 65 %, 5.3 g. **Mp** 137-140oC. **1H NMR** (TFA-d) δ (ppm) 0.92 (t, *J* = 6.8 Hz, 6H); 1.39 (m, 28H); 1.87 (m, 4H); 2.06 (m, 4H); 2.28 (s, 6H); 3.43 (m, 4H); 3.59 (m, 4H); 3.70 (m, 4H); 4.22 (m, 2H); 4.28, 4.41 (m, m, 4H); 4,48 (m, 2H); 4.65 (m, 2H); 4.82 (m, 2H); 7.34 (s, 2H). **13C NMR** (TFA-d) δ (ppm) 12.9; 19.2; 22.6; 24.0; 26.3; 29.0; 29.4; 31.9; 53.2; 54.8; 56.6; 62.8; 68.2; 69.6; 72.0; 73.9; 181.6. **FTIR** νmax/cm-1 3361 (OH, NH), 2926 and 2855 (CH), 1578 (C=O), 1083 (CO). **ESIMS** m/z 349 ([M/2]+, 100%). **Elemental analysis** calculated for C40H84N2O14, C 58.80, H 10.36, N 3.43% (found: C 58.98, H 10.08, N 3.81%).

**Tetramethylene-1,4-bis(*N*-dodecyl-*N*-deoxy-D-glucitolammonium acetate) (I-8)** (Figure S3)Yield 70 %, 6.2 g. **Mp** 149-153oC. **1H NMR** (TFA-d) δ (ppm) 0.91 (t, *J* = 6.6 Hz, 6H); 1.40 (m, 36H); 1.86 (m, 4H); 2.05 (m, 4H); 2.28 (s, 6H); 3.43 (m, 4H); 3.58 (m, 4H); 3.70 (m, 4H); 4.22 (m, 2H); 4.28, 4.41 (m, m, 4H); 4,47 (m, 2H); 4.65 (m, 2H); 4.82 (m, 2H); 7.36 (s, 2H). **13C NMR** (TFA-d) δ (ppm) 13.0; 19.2; 22.6; 24.1; 26.5; 29.5; 29.7; 32.1; 53.3; 55.0; 56.8; 64.5; 68.3; 69.7; 73.1; 74.2; 181.5. **FTIR** νmax/cm-1 3432 (OH, NH), 2925 and 2854 (CH), 1575 (C=O), 1088 (CO). **ESIMS** m/z 377 ([M/2]+, 100%). **Elemental analysis** calculated for C44H92N2O14xH2O, C 59.30, H 10.63, N 3.14% (found: C 58.63, H 10.22, N 3.12%).

**Hexamethylene-1,6-bis(*N*-alkyl-*N*-deoxy-D-glucitolammonium acetates)** **(I-9 ÷ I-12)** (Figure S4) (IUPAC name: alkyl({6-[alkyl(2S,3R,4R,5R)-(2,3,4,5,6-pentahydroxyhexyl)azaniumyl]hexyl})(2S,3R,4R,5R)-(2,3,4,5,6-pentahydroxyhexyl)azane bis(acetates)) were obtained in the same way as products with tetramethylene spacer **(I-5 ÷ I-8)**, but to the reaction mixtures was added hexamethylene-1,6-bis(*N*-deoxy-D-glucitolammonium chloride) **(I-4)** (5.17 g, 0.01 mol).

**Hexamethylene-1,6-bis(*N*-hexyl-*N*-deoxy-D-glucitolammonium acetate)** **(I-9)** (Figure S4) Yield 20 %, 1.5 g. **Mp** 118-122oC. **1H NMR** (TFA-d) δ (ppm) 0.96 (t, *J* = 6.5 Hz, 6H); 1.42 (m, 12H); 1.57 (m, 4H) 1.89 (m, 8H); 2.28 (s, 6H); 3.39 (m, 4H); 3.55 (m, 4H); 3.67 (m, 4H); 4.23 (m, 2H); 4.28, 4.31 (m, m, 4H); 4,49 (m, 2H); 4.67 (m, 2H); 4.83 (m, 2H); 7.23 (s, 2H). **13C NMR** (TFA-d) δ (ppm) 11.9; 18.5; 23.2; 23.4; 25.4; 30.5; 53.1; 54.4; 55.3; 64.2; 67.5; 69.0; 71.6; 73.4; 180.8. **FTIR** νmax/cm-1 3428 (OH, NH), 2956 and 2860 (CH), 1567 (C=O), 1084 (CO). **ESIMS** m/z 307 ([M/2]+, 100%). **Elemental analysis** calculated for C34H72N2O14xH2O, C 54.38, H 9.93, N 3.73% (found: C 54.23, H 9.99, N 3.81%).

**Hexamethylene-1,6-bis(*N*-octyl-*N*-deoxy-D-glucitolammonium acetate) (I-10)** (Figure S4) Yield 60 %, 4.7 g. **Mp** 143-146oC. **1H NMR** (TFA-d) δ (ppm) 0.92 (t, *J* = 6.8 Hz, 6H); 1.42 (m, 20H); 1.56 (m, 4H) 1.90 (m, 8H); 2.27 (s, 6H); 3.38 (m, 4H); 3.55 (m, 4H); 3.66 (m, 4H); 4.23 (m, 2H); 4.28, 4.31 (m, m, 4H); 4,47 (m, 2H); 4.67 (m, 2H); 4.83 (m, 2H); 7.23 (s, 2H). **13C NMR** (TFA-d) δ (ppm) 12.7; 19.1; 22.5; 23.8; 26.3; 29.0; 31.7; 53.8; 55.3; 56.3; 64.9; 68.2; 68.8; 69.6; 73.7; 181.6. **FTIR** νmax/cm-1 3422 (OH, NH), 2955 and 2857 (CH), 1578 (C=O), 1085 (CO). **ESIMS** m/z 335 ([M/2]+, 100%). **Elemental analysis** calculated for C38H80N2O14, C 57.84, H 10.22, N 3.55% (found: C 58.03, H 10.09, N 3.69%).

**Hexamethylene-1,6-bis(*N*-decyl-*N*-deoxy-D-glucitolammonium acetate) (I-11)** (Figure S4) Yield 63 %, 5.3 g. **Mp** 148-153oC. **1H NMR** (TFA-d) δ (ppm) 0.92 (t, *J* = 6.9 Hz, 6H); 1.37 (m, 28H); 1.57 (m, 4H) 1.90 (m, 8H); 2.28 (s, 6H); 3.39 (m, 4H); 3.54 (m, 4H); 3.67 (m, 4H); 4.23 (m, 2H); 4.29, 4.32 (m, m, 4H); 4,49 (m, 2H); 4.66 (m, 2H); 4.82 (m, 2H); 7.18 (s, 2H). **13C NMR** (TFA-d) δ (ppm) 12.9; 19.1; 22.5; 23.9; 26.3; 29.3; 29.4; 31.9; 53.7; 55.2; 56.1; 65.0; 68.3; 68.9; 72.3; 74.1; 181.6. **FTIR** νmax/cm-1 3437 (OH, NH), 2958 and 2855 (CH), 1578 (C=O), 1050 (CO). **ESIMS** m/z 363 ([M/2]+, 100%). **Elemental analysis** calculated for C42H88N2O14, C 59.69, H 10.49, N 3.31% (found: C 59.83, H 10.30, N 3.37%).

**Hexamethylene-1,6-bis(*N*-dodecyl-*N*-deoxy-D-glucitolammonium acetate) (I-12)** (Figure S4) Yield 68 %, 6.1 g. **Mp** 155-160oC. **1H NMR** (TFA-d) δ (ppm) 0.91 (t, *J* = 5.9 Hz, 6H); 1.40 (m, 36H); 1.57 (m, 4H) 1.89 (m, 8H); 2.28 (s, 6H); 3.39 (m, 4H); 3.57 (m, 4H); 3.68 (m, 4H); 4.23 (m, 2H); 4.29, 4.30 (m, m, 4H); 4,49 (m, 2H); 4.66 (m, 2H); 4.84 (m, 2H); 7.14 (s, 2H). **13C NMR** (TFA-d) δ (ppm) 12.8; 19.1; 22.5; 23.9; 26.3; 29.3; 29.6; 31.9; 53.8; 55.3; 56.1; 62.8; 68.8; 69.6; 70.7; 73.9; 181.5. **FTIR** νmax/cm-1 3427 (OH, NH), 2956 and 2853 (CH), 1575 (C=O), 1061 (CO). **ESIMS** m/z 391 ([M/2]+, 100%). **Elemental analysis** calculated for C46H96N2O14, C 61.30, H 10.74, N 3.11% (found: C 61.46, H 10.48, N 3.16%).

**Tetramethylene-1,4-bis(*N*-dodecyl-*N*-deoxy-D-glucitolamine) (I-13)** (Figure S5)

(IUPAC name: (2R,2’R,3R,3’R,4R,4’R,5S,5’S)-6,6’-butane-1,4-diylbis(dodecylazanediyl)bis (hexane-1,2,3,4,5-pentaol) was obtained in the reaction of tetramethylene-1,4-bis(*N*-dodecyl-*N*-deoxy-D-glucitolammonium acetate) **(I-8)** (8.73 g, 0.01 mol) with sodium hydroxide (1.4 g, 0.025 mol) in methanol (50 mL). Reaction was carried out on the magnetic stirrer in one hour. Then product was filtered out and dried. Yield 95%, 7.15 g. **Mp** 290-293oC. **FTIR** νmax/cm-1 3382 (OH), 2925 and 2854 (CH), 1099 (CO).

**Tetramethylene-1,4-bis(*N*-alkyl-*N*-octyl-*N*-deoxy-D-glucitolammonium iodides) (1÷3)** (Figure S6) (IUPAC name: alkyl({4-[alkyl(octyl)-(2S,3R,4R,5R)-(2,3,4,5,6-pentahydroxyhexyl) azaniumyl]-butyl})octyl-(2S,3R,4R,5R)-(2,3,4,5,6-pentahydroxyhexyl)azane bis(iodides)): Monohydrated tetramethylene-1,4-bis(*N*-octyl-*N*-deoxy-D-glucitolammonium acetate) **(I-6)** (7.79 g, 0.01 mol) was dissolved in *N,N*-dimethylformamide (50 mL). Then potassium hydroxide (1.12 g, 0.12 mol) and aliphatic iodide (iodoethane (2 mL, 0.025 mol), 1-iodopropane (2.4 mL, 0.025 mol) or 1-iodododecan (6.16 mL, 0.025 mol) respectively) were added. The reaction mixtures were heated in 152oC for 24 h. After that time solvent was evaporated, and residue was washed with diethyl ether. The white precipitates were filtered under vacuum, dried over P4O10 and purified by three times crystallization from nitromethane:methanol 3:2.

**Tetramethylene-1,4-bis(*N*-ethyl-*N*-octyl-*N*-deoxy-D-glucitolammonium iodide)** **(1)** (Figure S6) Yield 40 %, 3.8 g. **Mp** 230oC (decomp.). **1H NMR** (D2O) δ (ppm) 0.89 (m, 6H); 1.31 (m, 20H); 1.60 (m, 6H); 1.80 (m, 4H); 2.18 (m, 4H); 3.35-3.76 (m, 16H); 4.31-4.88 (m, 12H). **FTIR** νmax/cm-1 3367 (OH), 2927 and 2857 (CH), 965 (CO). **Elemental analysis** calculated for C36H78N2O10I2, C 45.38, H 8.25, N 2.94% (found: C 45.61, H 7.99, N 3.09%).

**Tetramethylene-1,4-bis(*N*-propyl-*N*-octyl-*N*-deoxy-D-glucitolammonium iodide) (2)** (Figure S6) Yield 45 %, 4.4 g. **Mp** 235oC (decomp.). **1H NMR** (D2O) δ (ppm) 0.87 (m, 6H); 1.30 (m, 24H); 1.60 (m, 6H); 1.87 (m, 4H); 2.19 (m, 4H); 3.39-3.76 (m, 16H); 4.08-4.80 (m, 12H). **FTIR** νmax/cm-1 3379 (OH), 2925 and 2855 (CH), 963 (CO). **Elemental analysis** calculated for C38H82N2O10I2, C 46.53, H 8.43, N 2.86% (found: C 46.81, H 8.03, N 2.98%).

**Tetramethylene-1,4-bis(*N*-dodecyl-*N*-octyl-*N*-deoxy-D-glucitolammonium iodide)** **(3)** (Figure S6) Yield 65 %, 8.0 g. **Mp** 250oC (decomp.). **1H NMR** (TFA-d) δ (ppm) 0.91 (m, 12H); 1.35 (m, 56H); 1.86 (m, 8H); 2.21 (m, 4H); 3.45 (m, 8H); 3.81 (m, 4H); 3.94 (m, 4H); 4.10-4.83 (m, 12H). **FTIR** νmax/cm-1 3434 (OH), 2930 and 2860 (CH), 962 (CO). **Elemental analysis** calculated for C56H118N2O10I2, C 54.53, H 9.64, N 2.27% (found: C 54.87, H 9.48, N 2.54%).

**Tetramethylene-1,4-bis(*N*-alkyl-*N*-decyl-*N*-deoxy-D-glucitolammonium iodides) (4÷6)** (Figure S7) (IUPAC name: Alkyl({4-[alkyl(decyl)-(2S,3R,4R,5R)-(2,3,4,5,6-pentahydroxyhexyl) azaniumyl]-butyl})decyl-(2S,3R,4R,5R)-(2,3,4,5,6-pentahydroxyhexyl)azane bis(iodides)) were obtained in the same way as tetramethylene-1,4-bis(*N*-alkyl-*N*-octyl*-N*-deoxy-D-glucitolammonium iodides) **(1÷3)**, but to the reaction mixtures was added tetramethylene-1,4-bis(*N*-decyl-*N*-deoxy-D-glucitolammonium acetate) **(I-7)** (8.17 g, 0.01 mol).

**Tetramethylene-1,4-bis(*N*-ethyl*-N*-decyl-*N*-deoxy-D-glucitolammonium iodide) (4)** (Figure S7) Yield 35 %, 3.5 g. **Mp** 240oC (decomp.). **1H NMR** (TFA-d) δ (ppm) 0.91 (m, 6H); 1.35 (m, 34H); 1.83 (m, 4H); 2.19 (m, 4H); 3.42, 3.66 (m, m, 8H); 3.74 (m, 4H); 3.92 (m, 4H); 4.10-4.99 (m, 12H). **FTIR** νmax/cm-1 3381 (OH), 2925 and 2854 (CH), 963 (CO). **Elemental analysis** calculated for C40H86N2O10I2, C 47.62, H 8.59, N 2.78% (found: C 48.06, H 8.26, N 2.66%).

**Tetramethylene-1,4-bis(*N*-propyl-*N*-decyl-*N*-deoxy-D-glucitolammonium iodide) (5)** (Figure S7) Yield 40 %, 4.1 g. **Mp** 243oC (decomp.). **1H NMR** (TFA-d) δ (ppm) 0.92 (m, 6H); 1.36 (m, 34H); 1.86 (m, 4H); 2.12 (m, 4H); 2.41 (m, 4H); 3.44, 3.54 (m, m, 8H); 3.77 (m, 4H); 3.93 (m, 4H); 4.10-4.85 (m, 12H). **FTIR** νmax/cm-1 3372 (OH), 2925 and 2854 (CH), 963 (CO). **Elemental analysis** calculated for C42H90N2O10I2, C 48.65, H 8.75, N 2.70% (found: C 48.86, H 8.28, N 2.91%).

**Tetramethylene-1,4-bis(*N*-dodecyl-*N*-decyl-*N*-deoxy-D-glucitolammonium iodide) (6)** (Figure S7) Yield 65 %, 8.4 g. **Mp** 255oC (decomp.). **1H NMR** (TFA-d) δ (ppm) 0.91 (m, 12H); 1.35 (m, 64H); 1.83 (m, 8H); 2.18 (m, 4H); 3.40 (m, 8H); 3.73 (m, 4H); 3.92 (m, 4H); 4.10-4.83 (m, 12H). **FTIR** νmax/cm-1 3368 (OH), 2924 and 2853 (CH), 962 (CO). **Elemental analysis** calculated for C60H126N2O10I2, 55.89, H 9.85, N 2.17% (found: C 56.08, H 9.59, N 2.56%).

**Tetramethylene-1,4-bis(*N*-alkyl-*N*-dodecyl-*N*-deoxy-D-glucitolammonium iodides)** **(7÷9)** (Figure S8) (IUPAC name: Alkyl({4-[alkyl(dodecyl)-(2S,3R,4R,5R)-(2,3,4,5,6-pentahydroxyhexyl)azaniumyl]butyl})-dodecyl-(2S,3R,4R,5R)-(2,3,4,5,6-pentahydroxyhexyl)azane bis(iodides)) were obtained in the same way as tetramethylene-1,4-bis(*N*-alkyl-*N*-octyl-*N*-deoxy-D-glucitolammonium iodides) **(1÷3)**, but to the reaction mixtures was added monohydrated tetramethylene-1,4-bis(*N*-dodecyl-*N*-deoxy-D-glucitolammonium acetate) **(I-8)** (8.91 g, 0.01 mol)

**Tetramethylene-1,4-bis(*N*-ethyl-*N*-dodecyl-*N*-deoxy-D-glucitolammonium iodide)** **(7)** (Figure S8) Yield 50 %, 5.3 g. **Mp** 235oC (decomp.). **1H NMR** (TFA-d) δ (ppm) 0.92 (m, 6H); 1.36 (m, 42H); 1.83 (m, 4H); 2.12 (m, 4H); 3.46, 3.64 (m, m, 8H); 3.83 (m, 4H); 3.89(m, 4H); 4.10-4.95 (m, 12H). **FTIR** νmax/cm-1 3367 (OH), 2924 and 2853 (CH), 964 (CO). **Elemental analysis** calculated for C44H94N2O10I2, C 49.62, H 8.90, N 2.63% (found: C 50.03, H 8.63, N 2.23%).

**Tetramethylene-1,4-bis(*N*-propyl-*N*-dodecyl-*N*-deoxy-D-glucitolammonium iodide)** **(8)** (Figure S8) Yield 60 %, 6.5 g. **Mp** 240oC (decomp.). **1H NMR** (TFA-d) δ (ppm) 0.91 (m, 6H); 1.35 (m, 42H); 1.89 (m, 4H); 2.18 (m, 4H); 2.39 (m, 4H); 3.41, 3.50 (m, m, 8H); 3.83 (m, 4H); 3.91 (m, 4H); 4.10-4.97 (m, 12H). **FTIR** νmax/cm-1 3371 (OH), 2924 and 2853 (CH), 963 (CO). **Elemental analysis** calculated for C46H98N2O10I2, C 50.54, H 9.04, N 2.56% (found: C 50.87, H 8.87, N 2.79%).

**Tetramethylene-1,4-bis(*N,N*-didodecyl-*N*-deoxy-D-glucitolammonium iodide)** **(9)** (Figure S8) Yield 68 %, 9.1 g. **Mp** 257oC (decomp.). **1H NMR** (TFA-d) δ (ppm) 0.91 (m, 12H); 1.35 (m, 72H); 1.89 (m, 8H); 2.12 (m, 4H); 3.49 (m, 8H); 3.64 (m, 4H); 3.89 (m, 4H); 4.10-4.84 (m, 12H). **FTIR** νmax/cm-1 3422 (OH), 2923 and 2853 (CH), 961 (CO). **Elemental analysis** calculated for C64H134N2O10I2, C 57.13, H 10.04, N 2.08% (found: C 57.37, H 9.87, N 2.29%).

**Hexamethylene-1,6-bis(*N*-dodecyl-*N*-alkyl-*N*-deoxy-D-glucitolammonium iodides) (10÷12)** (Figure S9)(IUPAC name: Alkyl({6-[alkyl(dodecyl)(2S,3R,4R,5R)-(2,3,4,5,6-pentahydroxyhexyl) azaniumyl]-heksyl})-dodecyl-(2S,3R,4R,5R)-(2,3,4,5,6-pentahydroxyhexyl)azane bis(iodides)) were obtained in the same way as analogue with tetramethylene spacer **(1÷9)**, but to the reaction mixtures was added 1-iodododecan (6.16 mL, 0.025 mol) and hexamethylene-1,6-bis(*N*-octyl-*N*-deoxy-D-glucitolammonium acetate) **(I-10)** (7.89 g, 0.01 mol), hexamethylene-1,6-bis(*N*-decyl-*N*-deoxy-D-glucitolammonium acetate) (8.45 g, 0.01 mol) **(I-11)** or hexamethylene-1,6-bis(*N*-dodecyl-*N*-deoxy-D-glucitolammonium acetate) **(I-12)** (9.01 g, 0.01 mol) respectively.

**Hexamethylene-1,6-bis(*N*-dodecyl-*N*-octyl-*N*-deoxy-D-glucitolammonium iodide)** **(10)** (Figure S9) Yield 60 %, 7.6 g. **Mp** 245oC (decomp.). **1H NMR** (TFA-d) δ (ppm) 0.91 (m, 12H); 1.35 (m, 56H); 1.64 (m, 4H); 1.91 (m, 12H); 3.42 (m, 8H); 3.68 (m, 4H); 3.93 (m, 4H); 4.25-4.67 (m, 12H). **FTIR** νmax/cm-1 3421 (OH), 2956 and 2831 (CH), 966 (CO). **Elemental analysis** calculated for C58H122N2O10I2, C 55.23, H 9.75, N 2.22% (found: C 55.62, H 9.55, N 2.40%).

**Hexamethylene-1,6-bis(*N*-dodecyl-*N*-decyl-*N*-deoxy-D-glucitolammonium iodide)** **(11)** (Figure S9) Yield 65 %, 8.6 g. **Mp** 269oC (decomp.). **1H NMR** (TFA-d) δ (ppm) 0.92 (m, 12H); 1.35 (m, 64H); 1.58 (m, 4H); 1.86 (m, 12H); 3.40 (m, 8H); 3.67 (m, 4H); 3.93 (m, 4H); 4.13-4.90 (m, 12H). **FTIR** νmax/cm-1 3425 (OH), 2925 and 2854 (CH), 962 (CO). **Elemental analysis** calculated for C62H130N2O10I2, C 56.52, H 9.95, N 2.13% (found C 56.87, H 9.71, N 2.30%).

**Hexamethylene-1,6-bis(*N,N*-didodecyl-*N*-deoxy-D-glucitolammonium iodide)** **(12)** (Figure S9) Yield 65 %, 8.9 g. **Mp** 270oC (decomp.). **1H NMR** (TFA-d) δ (ppm) 0.91 (m, 12H); 1.35 (m, 72H); 1.56 (m, 4H); 1.86 (m, 12H); 3.40 (m, 8H); 3.67 (m, 4H); 3.90 (m, 4H); 4.25-4.82 (m, 12H). **FTIR** νmax/cm-1 3425 (OH), 2924 and 2854 (CH), 962 (CO). **Elemental analysis** calculated for C66H138N2O10I2, C 57.71, H 10.13, N 2.04% (found: C 57.98, H 9.94, N 2.38%).
